# Supplementary material
Source: Elsevier journal article supplement (https://www.sciencedirect.com/science/article/pii/S2341287920301307)
Supplement: mmc1 [file S2341287920301307:mmc1.docx]

| **Variables** | **Clasificación** | **Observaciones** |
| --- | --- | --- |
| **Número** | - Individual - Pareja - Grupo | Número de niños que aparecen en el anuncio. |
| **Sexo** | - Varón - Mujer - Mixto | Anuncios con protagonización masculina, femenina, o mixta. |
| **Edad** | - Lactante - Preescolar - Escolar - Adolescente | Grupo de edad del niño o niños que aparecen en el anuncio |
| **Raza** | - Caucásica - Negra - Varias/Otras | Raza de los niños que aparecen en el anuncio. Anuncios con niños de varias razas se encuadra en “mixta/otras” |
| **Aspecto físico** | - Sano - Discapacitado - Enfermo - Muerto | Estado y aspecto físico con el que aparece el menor en el anuncio |
| **Situación** | - Solo - Acompañado de padre o madre - Acompañado de ambos padres - Acompañado de otros niños - Otras situaciones | Se refiere a la aparición del menor en el anuncio solo, acompañado de sus familiares o de otras personas. |
| **Entorno** | - Naturaleza - Urbano - Hogar - Otros | Situación y contexto en el que aparece el niño anunciando un producto. |
| **Producto comercializado** | - Tecnología - Coches - ONG - Seguros - Viajes - Deporte - Ropa - Alimentación - Hogar - Bancos - Anuncios del gobierno - Juguetes - Productos infantiles | Categoría de producto o servicio que oferta el niño en el anuncio.  **Recodificación**:   1. Anuncios orientados al adulto: tecnología, ONG, seguros, deporte, bancos, anuncios del gobierno. 2. Anuncios orientados a la familia: coches, viajes, ropa, alimentación, hogar 3. Anuncios orientados a los menores: juguetes, productos infantiles. |
| **Página web** | - yahoo.com (B) - lavanguardia.com (PG) - eldiario.es (PG) - forocoches.com - elle.es (PCM) - eltiempo.es (O) - sport.es (PD) - 20minutos.es (PG) - eleconomista.es (PE) - expansion.com (PE) - mundodeportivo.com (PD) - marca.com (PD) - publico.es (PG) - elpais.com (PG) - elmundo.es (PG) - msn.com (B) - as.com (PD) - elconfidencial.com (PG) - abc.es (PG) | Sitio web que promociona el anuncio con niños  **Recodificación**:   1. Prensa deportiva (PD) 2. Prensa general (PG) 3. Prensa corazón / moda (PCM) 4. Prensa económica (PE) 5. Buscadores (B) 6. Otras (O) |
| **Tipo de anuncio** | - Banner - Pop up - Pop under - Enlace patrocinado | Forma de presentación del anuncio en la web |
| **Uso** | - Adecuado - Inadecuado | La variable “uso del menor” la valoraremos según el protocolo de buenas prácticas. |
| **Principio 1** | - Sí - No | Describiendo como “sí” aquellos anuncios de índole “inadecuado” que incumplan dicho principio. |
| **Principio 2** | - Sí - No | Describiendo como “sí” aquellos anuncios de índole “inadecuado” que incumplan dicho principio. |
| **Principio 3** | - Sí - No | Describiendo como “sí” aquellos anuncios de índole “inadecuado” que incumplan dicho principio. |
| **Principio 4** | - Sí - No | Describiendo como “sí” aquellos anuncios de índole “inadecuado” que incumplan dicho principio. |
| **Principio 5** | - Sí - No | Describiendo como “sí” aquellos anuncios de índole “inadecuado” que incumplan dicho principio. |
| **Principio 6** | - Sí - No | Describiendo como “sí” aquellos anuncios de índole “inadecuado” que incumplan dicho principio. |
